# Supplementary material for: Mass-Rearing Conditions Do Not Always Reduce Genetic Diversity: The Case of the Mexican Fruit Fly, Anastrepha ludens (Diptera: Tephritidae)
Source: MDPI journal article supplement (doi:10.3390/insects15010056), 2024-01-12
Supplement: s1 [file s1]

Table S1. Original data set of genotypes with nuclear DNA fragments of seven microsatellites of samples *Anastropheba ludens* Loew from field and mass-reared. LAB = laboratory strain; TA7 = Tapachula-7 strain; WIL = wild strain. Each line corresponds to an individual, and by column are given its diploid genotype per microsatellite.

| Pop | Microsatellite |     |          |     |          |     |         |     |          |     |          |     |          |     |
|-----|----------------|-----|----------|-----|----------|-----|---------|-----|----------|-----|----------|-----|----------|-----|
|     | Asus1-1H       |     | Asus1-2B |     | Asus1-2F |     | Asus-3B |     | Asus1-4H |     | Asus1-6C |     | Asus1-8D |     |
| LAB | 225            | 225 | 135      | 135 | 115      | 125 | 105     | 105 | 185      | 185 | 495      | 505 | 205      | 225 |
| LAB | 215            | 215 | 115      | 125 | 285      | 295 | 105     | 105 | 185      | 185 | 495      | 495 | 265      | 265 |
| LAB | 215            | 215 | 115      | 115 | 275      | 305 | 105     | 105 | 185      | 185 | 505      | 505 | 215      | 215 |
| LAB | 215            | 215 | 115      | 115 | 295      | 295 | 105     | 105 | 185      | 185 | 505      | 505 | 205      | 205 |
| LAB | 215            | 215 | 115      | 125 | 295      | 295 | 125     | 135 | 185      | 185 | 505      | 505 | 215      | 215 |
| LAB | 215            | 215 | 125      | 125 | 295      | 295 | 105     | 105 | 155      | 155 | 495      | 505 | 215      | 255 |
| LAB | 205            | 205 | 115      | 115 | 295      | 295 | 105     | 105 | 185      | 195 | 505      | 505 | 205      | 205 |
| LAB | 215            | 215 | 115      | 115 | 295      | 295 | 105     | 105 | 245      | 245 | 495      | 495 | 215      | 215 |
| LAB | 215            | 215 | 125      | 135 | 275      | 295 | 105     | 105 | 185      | 185 | 485      | 495 | 205      | 205 |
| LAB | 215            | 215 | 135      | 135 | 285      | 295 | 105     | 105 | 185      | 185 | 485      | 495 | 205      | 205 |
| LAB | 215            | 215 | 115      | 115 | 275      | 295 | 105     | 105 | 295      | 295 | 485      | 505 | 205      | 205 |
| LAB | 215            | 215 | 115      | 115 | 275      | 295 | 105     | 105 | 185      | 185 | 485      | 495 | 205      | 205 |
| LAB | 215            | 215 | 115      | 115 | 295      | 295 | 105     | 105 | 185      | 185 | 485      | 505 | 205      | 205 |
| LAB | 215            | 215 | 115      | 115 | 295      | 295 | 105     | 105 | 185      | 185 | 485      | 495 | -1       | -1  |
| LAB | 215            | 215 | 115      | 115 | 275      | 305 | 115     | 125 | 185      | 185 | 505      | 505 | -1       | -1  |
| LAB | 215            | 215 | 115      | 115 | 295      | 295 | 105     | 105 | 155      | 155 | 485      | 495 | 215      | 215 |
| LAB | 215            | 215 | 175      | 215 | 295      | 295 | 105     | 105 | 155      | 155 | 495      | 495 | 215      | 215 |
| LAB | 215            | 215 | 115      | 115 | 275      | 295 | 105     | 105 | 155      | 155 | 495      | 495 | 215      | 215 |
| LAB | 215            | 215 | 115      | 125 | 295      | 295 | 105     | 105 | 185      | 185 | 505      | 505 | 215      | 215 |
| LAB | 215            | 215 | 115      | 115 | 295      | 295 | 105     | 105 | 185      | 185 | 495      | 495 | 215      | 215 |
| LAB | 215            | 215 | 125      | 125 | 275      | 295 | 105     | 105 | 185      | 185 | 485      | 495 | 205      | 205 |
| LAB | 215            | 215 | 115      | 125 | 275      | 295 | 105     | 105 | 185      | 185 | 485      | 505 | 205      | 205 |
| LAB | 215            | 215 | 115      | 125 | 295      | 295 | 105     | 105 | 185      | 185 | 485      | 505 | 205      | 205 |
| LAB | 215            | 215 | 125      | 125 | 275      | 295 | 105     | 105 | 185      | 185 | 485      | 505 | -1       | -1  |
| LAB | 215            | 215 | 115      | 115 | 295      | 295 | 105     | 105 | 185      | 185 | 485      | 495 | 205      | 205 |
| LAB | 215            | 215 | 115      | 115 | 295      | 295 | 105     | 105 | 185      | 185 | 485      | 495 | 205      | 205 |
| LAB | 215            | 215 | 115      | 115 | 275      | 305 | 105     | 105 | 185      | 185 | 485      | 495 | 205      | 205 |
| LAB | 215            | 215 | 115      | 125 | 305      | 305 | 105     | 105 | 185      | 185 | 485      | 505 | 215      | 215 |
| LAB | 215            | 215 | 125      | 135 | 295      | 295 | -1      | -1  | 155      | 155 | 505      | 505 | 215      | 215 |
| LAB | 215            | 215 | 115      | 125 | 295      | 295 | -1      | -1  | 185      | 185 | 495      | 495 | -1       | -1  |
| TA7 | 215            | 215 | 115      | 115 | 275      | 275 | 115     | 115 | 185      | 185 | 485      | 495 | 205      | 215 |
| TA7 | 215            | 215 | 125      | 125 | 275      | 275 | 105     | 105 | 195      | 195 | 495      | 495 | 205      | 215 |
| TA7 | 215            | 215 | 115      | 115 | 275      | 295 | 105     | 105 | 185      | 185 | 485      | 495 | 265      | 265 |

|     |     |     |     |     |     |     |     |     |     |     |     |     |     |     |
|-----|-----|-----|-----|-----|-----|-----|-----|-----|-----|-----|-----|-----|-----|-----|
| TA7 | 215 | 215 | 125 | 135 | 275 | 275 | 105 | 105 | 185 | 185 | 485 | 495 | 265 | 265 |
| TA7 | 215 | 215 | 125 | 125 | 275 | 295 | 105 | 105 | 185 | 185 | 485 | 505 | 275 | 295 |
| TA7 | 215 | 215 | 115 | 115 | -1  | -1  | 105 | 105 | 195 | 195 | 505 | 505 | 275 | 275 |
| TA7 | 215 | 215 | 115 | 115 | -1  | -1  | 105 | 105 | 195 | 195 | 495 | 505 | 265 | 265 |
| TA7 | 215 | 215 | 135 | 145 | -1  | -1  | 105 | 105 | 195 | 195 | 495 | 595 | 265 | 265 |
| TA7 | 215 | 215 | 115 | 115 | 305 | 305 | 105 | 105 | 195 | 195 | 495 | 495 | 265 | 265 |
| TA7 | 215 | 215 | 115 | 115 | 305 | 305 | 105 | 105 | 185 | 195 | 495 | 495 | 265 | 295 |
| TA7 | 215 | 215 | 115 | 115 | 275 | 275 | 105 | 105 | 185 | 185 | 485 | 505 | 265 | 265 |
| TA7 | 215 | 215 | 135 | 145 | 275 | 295 | 105 | 105 | 195 | 195 | 495 | 495 | 205 | 215 |
| TA7 | 215 | 215 | 115 | 115 | 275 | 275 | 105 | 105 | 195 | 195 | 485 | 495 | 205 | 205 |
| TA7 | 215 | 215 | 135 | 135 | 275 | 295 | 105 | 105 | 195 | 195 | 485 | 505 | 265 | 265 |
| TA7 | 215 | 215 | 115 | 115 | 275 | 295 | 105 | 105 | 195 | 195 | 485 | 495 | 265 | 265 |
| TA7 | 215 | 215 | 115 | 115 | -1  | -1  | 105 | 105 | 185 | 185 | 495 | 505 | 265 | 265 |
| TA7 | 215 | 215 | 125 | 135 | -1  | -1  | 105 | 105 | 185 | 185 | 485 | 505 | 275 | 275 |
| TA7 | 215 | 215 | 125 | 135 | -1  | -1  | 105 | 105 | 185 | 185 | 485 | 505 | 275 | 275 |
| TA7 | 215 | 215 | 125 | 125 | -1  | -1  | 105 | 105 | 195 | 195 | 465 | 495 | 265 | 265 |
| TA7 | 215 | 215 | 135 | 135 | -1  | -1  | 105 | 105 | 185 | 195 | 465 | 495 | 265 | 265 |
| TA7 | 215 | 215 | 135 | 135 | 275 | 275 | 105 | 105 | 195 | 195 | 485 | 495 | 265 | 265 |
| TA7 | 215 | 215 | 115 | 115 | 275 | 275 | 105 | 105 | 195 | 195 | 465 | 485 | 265 | 265 |
| TA7 | 175 | 215 | 135 | 135 | 275 | 275 | 105 | 105 | 195 | 195 | 485 | 495 | 265 | 265 |
| TA7 | 215 | 215 | 125 | 135 | 275 | 275 | 105 | 105 | 195 | 195 | 485 | 495 | 255 | 265 |
| TA7 | 175 | 215 | 135 | 135 | 275 | 295 | 105 | 105 | 195 | 195 | 465 | 485 | 265 | 285 |
| TA7 | 215 | 215 | 125 | 125 | -1  | -1  | 105 | 105 | 185 | 185 | 485 | 495 | 215 | 215 |
| TA7 | 175 | 215 | 115 | 115 | 295 | 295 | 105 | 105 | 185 | 185 | 465 | 485 | 265 | 265 |
| TA7 | 175 | 215 | 115 | 115 | -1  | -1  | 105 | 105 | 195 | 195 | 485 | 495 | 275 | 275 |
| TA7 | 115 | 115 | 115 | 125 | 295 | 295 | 105 | 105 | 185 | 195 | 475 | 485 | 275 | 275 |
| TA7 | 175 | 215 | 125 | 135 | 295 | 295 | 115 | 115 | 185 | 195 | 505 | 505 | 275 | 275 |
| TA7 | 215 | 215 | 125 | 125 | 285 | 295 | 105 | 105 | 195 | 195 | 495 | 495 | 265 | 265 |
| WIL | 215 | 215 | 115 | 115 | 275 | 295 | 115 | 115 | 185 | 195 | 485 | 495 | 205 | 205 |
| WIL | 215 | 215 | 115 | 125 | 275 | 305 | 105 | 105 | 185 | 195 | 485 | 495 | 205 | 205 |
| WIL | 215 | 215 | 115 | 115 | 295 | 295 | 105 | 105 | 185 | 195 | 495 | 495 | 205 | 205 |
| WIL | 215 | 215 | 195 | 195 | 295 | 295 | 105 | 105 | 195 | 195 | 505 | 505 | 205 | 205 |
| WIL | 215 | 215 | 115 | 115 | 295 | 295 | 105 | 105 | 195 | 195 | 505 | 505 | 205 | 205 |
| WIL | 215 | 215 | 115 | 125 | 295 | 295 | 105 | 105 | 195 | 195 | 505 | 505 | 265 | 265 |
| WIL | 215 | 215 | 115 | 135 | 275 | 275 | 105 | 105 | 185 | 195 | 485 | 495 | 205 | 205 |
| WIL | 215 | 215 | 115 | 125 | 275 | 275 | 105 | 105 | 195 | 195 | 485 | 495 | 205 | 205 |
| WIL | 215 | 215 | 125 | 135 | 275 | 295 | 105 | 115 | 195 | 195 | 485 | 495 | 205 | 205 |
| WIL | 215 | 215 | 115 | 125 | 295 | 295 | 105 | 105 | 185 | 185 | 485 | 495 | 215 | 215 |
| WIL | 215 | 215 | 115 | 115 | 285 | 295 | 105 | 105 | 185 | 195 | 475 | 485 | 215 | 215 |

|     |     |     |     |     |     |     |     |     |     |     |     |     |     |     |
|-----|-----|-----|-----|-----|-----|-----|-----|-----|-----|-----|-----|-----|-----|-----|
| WIL | 215 | 215 | 115 | 115 | 295 | 295 | 105 | 105 | 195 | 195 | 495 | 495 | 205 | 205 |
| WIL | 215 | 215 | 115 | 115 | 275 | 295 | 105 | 105 | 185 | 185 | 485 | 495 | 205 | 205 |
| WIL | 215 | 215 | 115 | 125 | 275 | 275 | 105 | 105 | 185 | 185 | 495 | 495 | 205 | 205 |
| WIL | 215 | 215 | 115 | 125 | 275 | 275 | 105 | 105 | 185 | 185 | 485 | 495 | 265 | 265 |
| WIL | 215 | 215 | 115 | 115 | 295 | 295 | 105 | 105 | 195 | 195 | 485 | 495 | 265 | 265 |
| WIL | 215 | 215 | 115 | 115 | 295 | 295 | 105 | 105 | 195 | 195 | 485 | 495 | 205 | 205 |
| WIL | 215 | 215 | 115 | 115 | 295 | 295 | 105 | 105 | 195 | 195 | 485 | 495 | 205 | 205 |
| WIL | 215 | 215 | 115 | 115 | 295 | 295 | -1  | -1  | 195 | 195 | 485 | 505 | 205 | 205 |
| WIL | 215 | 215 | 115 | 115 | 295 | 295 | 115 | 115 | 185 | 185 | 465 | 485 | 205 | 205 |
| WIL | 215 | 215 | 115 | 115 | 275 | 275 | -1  | -1  | 185 | 185 | 495 | 505 | -1  | -1  |
| WIL | 215 | 215 | 115 | 115 | -1  | -1  | -1  | -1  | 155 | 155 | 535 | 545 | 215 | 215 |
| WIL | 215 | 215 | 135 | 145 | 275 | 275 | -1  | -1  | 185 | 185 | 485 | 505 | 215 | 215 |
| WIL | 215 | 215 | 115 | 115 | 155 | 155 | 105 | 115 | 195 | 195 | 595 | 595 | 215 | 215 |
| WIL | 215 | 215 | 115 | 115 | 295 | 295 | 95  | 95  | 195 | 195 | 485 | 495 | 195 | 195 |
| WIL | 215 | 215 | 115 | 115 | -1  | -1  | 105 | 105 | 195 | 195 | 485 | 495 | 205 | 215 |
| WIL | 215 | 215 | 115 | 115 | 305 | 305 | 105 | 115 | 185 | 185 | 485 | 495 | -1  | -1  |
| WIL | 215 | 215 | 115 | 125 | 275 | 295 | 105 | 105 | 195 | 195 | 485 | 495 | 205 | 205 |
| WIL | 215 | 215 | 115 | 135 | 275 | 275 | 105 | 105 | 195 | 195 | 465 | 485 | -1  | -1  |
